# Supplementary material
Source: PubMed Central journal article supplement (PMC9003864)
Supplement: NIHMS1783672-supplement-1.pdf [file NIHMS1783672-supplement-1.pdf]

## Supplemental Information

**SUPPLEMENTAL TABLE 4** List of HCPCS Codes Classified as Home Care Health Claims

| HHC Category | HCPCS Code <sup>a</sup> | Description                                                                                                                                                                                                                                                                                                    |
|--------------|-------------------------|----------------------------------------------------------------------------------------------------------------------------------------------------------------------------------------------------------------------------------------------------------------------------------------------------------------|
| RN/LPN       | G0154                   | Direct skilled services of a LPN or RN                                                                                                                                                                                                                                                                         |
| HHA/CNA      | G0156                   | Services of home health/hospice aide in home health or hospice settings, every 15min                                                                                                                                                                                                                           |
| RN/LPN       | G0162                   | Skilled services by a RN for management and evaluation of the plan of care; every 15min (the patient's underlying condition or complication requires an RN to ensure that essential non-skilled care achieves its purpose in the home health or hospice setting)                                               |
| RN/LPN       | G0163                   | Skilled services of a LPN or RN for the observation and assessment of the patient's condition, every 15min (the change in the patient's condition requires skilled nursing personnel to identify and evaluate the patient's need for possible modification of treatment in the home health or hospice setting) |
| RN/LPN       | G0164                   | Skilled services of a LPN or RN, in the training and/or education of a patient or family member, in the home health or hospice setting, every 15min                                                                                                                                                            |
| RN/LPN       | G0299                   | Direct skilled nursing services of a RN in the home health or hospice setting, every 15min                                                                                                                                                                                                                     |
| RN/LPN       | G0300                   | Direct skilled nursing services of a LPN in the home health or hospice setting, every 15min                                                                                                                                                                                                                    |
| RN/LPN       | G0490                   | Face-to-face home health nursing visit by a rural health clinic (RHC) or federally qualified health center (FQHC) in an area with a shortage of home health agencies (services limited to RN or LPN only)                                                                                                      |
| RN/LPN       | G0493                   | Skilled services of a RN for the observation and assessment of the patient's condition, every 15min (the change in the patient's condition requires skilled nursing personnel to identify and evaluate the patient's need for possible modification of treatment in the home health or hospice setting)        |
| RN/LPN       | G0494                   | Skilled services of a LPN for the observation and assessment of the patient's condition, every 15min (the change in the patient's condition requires skilled nursing personnel to identify and evaluate the patient's need for possible modification of treatment in the home health or hospice setting)       |
| RN/LPN       | G0495                   | Skilled services of a RN, in the training and/or education of a patient or family member, in the home health or hospice setting, every 15min                                                                                                                                                                   |
| RN/LPN       | G0496                   | Skilled services of a LPN, in the training and/or education of a patient or family member, in the home health or hospice setting, every 15min                                                                                                                                                                  |
| NS           | Q5001                   | Care provided in patient's home/residence (only if STDPROV= home health [920])                                                                                                                                                                                                                                 |
| NS           | S5108                   | Home care training to home care client, per 15 min                                                                                                                                                                                                                                                             |
| NS           | S5109                   | Home care training to home care client, per session                                                                                                                                                                                                                                                            |
| NS           | S5110                   | Home care training, family; per 15 min                                                                                                                                                                                                                                                                         |
| NS           | S5111                   | Home care training, family; per session                                                                                                                                                                                                                                                                        |
| NS           | S5115                   | Home care training, nonfamily; per 15 min                                                                                                                                                                                                                                                                      |
| NS           | S5116                   | Home care training, nonfamily; per session                                                                                                                                                                                                                                                                     |
| PA           | S5125 <sup>a</sup>      | Attendant care services; per 15 min                                                                                                                                                                                                                                                                            |
| PA           | S5126                   | Attendant care services; per diem                                                                                                                                                                                                                                                                              |
| PA           | S5135                   | Companion care, adult (eg, IADL/ADL); per 15 min                                                                                                                                                                                                                                                               |
| PA           | S5136 <sup>a</sup>      | Companion care, adult (eg, IADL/ADL); per diem                                                                                                                                                                                                                                                                 |
| PA           | S5150 <sup>a</sup>      | Unskilled respite care, not hospice; per 15 min                                                                                                                                                                                                                                                                |
| PA           | S5151 <sup>a</sup>      | Unskilled respite care, not hospice; per diem                                                                                                                                                                                                                                                                  |
| NS           | S5190 <sup>a</sup>      | Wellness assessment, performed by nonphysician                                                                                                                                                                                                                                                                 |
| NS           | S9097                   | Home visit for wound care                                                                                                                                                                                                                                                                                      |
| HHA/CNA      | S9122                   | Home health aide or certified nurse assistant, providing care in the home; per hour                                                                                                                                                                                                                            |
| RN/LPN       | S9123                   | Nursing care, in the home; by RN, per hour (use for general nursing care only, not to be used when CPT codes 99500-99602 can be used)                                                                                                                                                                          |
| RN/LPN       | S9124                   | Nursing care, in the home; by LPN, per hour                                                                                                                                                                                                                                                                    |
| RN/LPN       | T1000 <sup>a</sup>      | Private duty / independent nursing service(s) – licensed, up to 15 min                                                                                                                                                                                                                                         |
| RN/LPN       | T1001 <sup>a</sup>      | Nursing assessment / evaluation                                                                                                                                                                                                                                                                                |
| RN/LPN       | T1002 <sup>a</sup>      | RN services, up to 15 min                                                                                                                                                                                                                                                                                      |
| RN/LPN       | T1003 <sup>a</sup>      | LPN/LYN services, up to 15 min                                                                                                                                                                                                                                                                                 |
| HHA/CNA      | T1004 <sup>a</sup>      | Services of a qualified nursing aide, up to 15 min                                                                                                                                                                                                                                                             |
| NS           | T1005                   | Respite care services, up to 15 min                                                                                                                                                                                                                                                                            |
| HHA/CNA      | T1019                   | Personal care services, per 15 min, not for an inpatient or resident of a hospital, nursing facility, ICF/MR or IMD, part of the individualized plan of treatment (code may not be used to identify services provided by home health aide or certified nurse assistant)                                        |
| HHA/CNA      | T1021                   | Home health aide or certified nurse assistant, per visit                                                                                                                                                                                                                                                       |
| RN/LPN       | T1030                   | Nursing care, in the home, by registered nurse, per diem                                                                                                                                                                                                                                                       |

RN, registered nurse; LPN, licensed practical nurse; HHA, home health aide; CNA, certified nursing assistant; PA, personal assistant; NS, not specified.

<sup>a</sup> Claim associated with HCPCS Code must have also had an indicated standardized provider of Home Health Agency to be included in the HHC cohort.

**SUPPLEMENTAL TABLE 5** List of CPT Codes Classified as Home Health Claims

| HHC Category | CPT Code | Description                                                                                                            |
|--------------|----------|------------------------------------------------------------------------------------------------------------------------|
| NS           | 99348    | Home visit established patient low-moderate severity 25 min                                                            |
| NS           | 99349    | Home visit established patient moderate-high severity 40 min                                                           |
| NS           | 99501    | Home visit for postnatal assessment and follow-up care                                                                 |
| NS           | 99502    | Home visit for newborn care and assessment                                                                             |
| NS           | 99503    | Home visit for respiratory therapy care (eg, bronchodilator, oxygen therapy, respiratory assessment, apnea evaluation) |
| NS           | 99504    | Home visit for mechanical ventilation care                                                                             |
| NS           | 99505    | Home visit for stoma care and maintenance including colostomy and cystostomy                                           |
| NS           | 99507    | Home visit for care and maintenance of catheter(s) (eg, urinary, drainage, and enteral)                                |
| NS           | 99509    | Home visit assistance daily living and personal care                                                                   |

NS, not specified.

**SUPPLEMENTAL TABLE 6** Number and Organ Systems Affected by Chronic Conditions in Children Receiving Home Health Care Who Are Enrolled in Medicaid (*N* = 41 434)

| Complexity Characteristics         | Total HHPC Population<br>( <i>n</i> = 41 434) | Children With<br>Noncomplex Chronic<br>Conditions ( <i>n</i> = 16 000,<br>38.6%) | Children With Complex Chronic Conditions                   |                                                            |
|------------------------------------|-----------------------------------------------|----------------------------------------------------------------------------------|------------------------------------------------------------|------------------------------------------------------------|
|                                    |                                               |                                                                                  | Without Technology<br>Assistance ( <i>n</i> = 8888, 21.5%) | With Technology<br>Assistance<br>( <i>n</i> = 6408, 15.5%) |
| <b>System Classification</b>       |                                               |                                                                                  |                                                            |                                                            |
| Neurodevelopmental and psychiatric | 17 557 (42.4)                                 | 8939 (55.9)                                                                      | 4253 (47.9)                                                | 4365 (68.1)                                                |
| Digestive                          | 10 306 (24.9)                                 | 2945 (18.4)                                                                      | 2107 (23.7)                                                | 5254 (82)                                                  |
| Respiratory                        | 8709 (21)                                     | 2647 (16.5)                                                                      | 2287 (25.7)                                                | 3775 (58.9)                                                |
| Neuro                              | 8591 (20.7)                                   | 898 (5.6)                                                                        | 3324 (37.4)                                                | 4369 (68.2)                                                |
| Cardiac                            | 6573 (15.9)                                   | 657 (4.1)                                                                        | 2686 (30.2)                                                | 3230 (50.4)                                                |
| Musculoskeletal                    | 6053 (14.6)                                   | 1410 (8.8)                                                                       | 1934 (21.8)                                                | 2709 (42.3)                                                |
| Urogenital                         | 5444 (13.1)                                   | 1106 (6.9)                                                                       | 1742 (19.6)                                                | 2596 (40.5)                                                |
| Skin                               | 3716 (9)                                      | 2399 (15)                                                                        | 758 (8.5)                                                  | 559 (8.7)                                                  |
| Vision and eye                     | 3409 (8.2)                                    | 777 (4.9)                                                                        | 1120 (12.6)                                                | 1512 (23.6)                                                |
| Hearing and ear                    | 2328 (5.6)                                    | 736 (4.6)                                                                        | 666 (7.5)                                                  | 926 (14.5)                                                 |
| Endocrine                          | 2260 (5.5)                                    | 326 (2)                                                                          | 851 (9.6)                                                  | 1083 (16.9)                                                |
| Hematology                         | 1970 (4.8)                                    | 181 (1.1)                                                                        | 942 (10.6)                                                 | 847 (13.2)                                                 |
| Nutrition                          | 1947 (4.7)                                    | 436 (2.7)                                                                        | 616 (6.9)                                                  | 895 (14)                                                   |
| Genetic                            | 1755 (4.2)                                    | 6 (0)                                                                            | 884 (9.9)                                                  | 865 (13.5)                                                 |
| Metabolic                          | 1731 (4.2)                                    | 5 (0)                                                                            | 1029 (11.6)                                                | 697 (10.9)                                                 |
| Renal                              | 953 (2.3)                                     | 40 (0.3)                                                                         | 425 (4.8)                                                  | 488 (7.6)                                                  |

Data are presented as *n* (%).
